# Supplementary material for: Capture Hi-C reveals novel candidate genes and complex long-range interactions with related autoimmune risk loci
Source: PubMed Central journal article supplement (PMC4674669; doi:10.1038/ncomms10069), 2015-11-30
Supplement: ncomms10069-s1.pdf [file ncomms10069-s1.pdf]

a

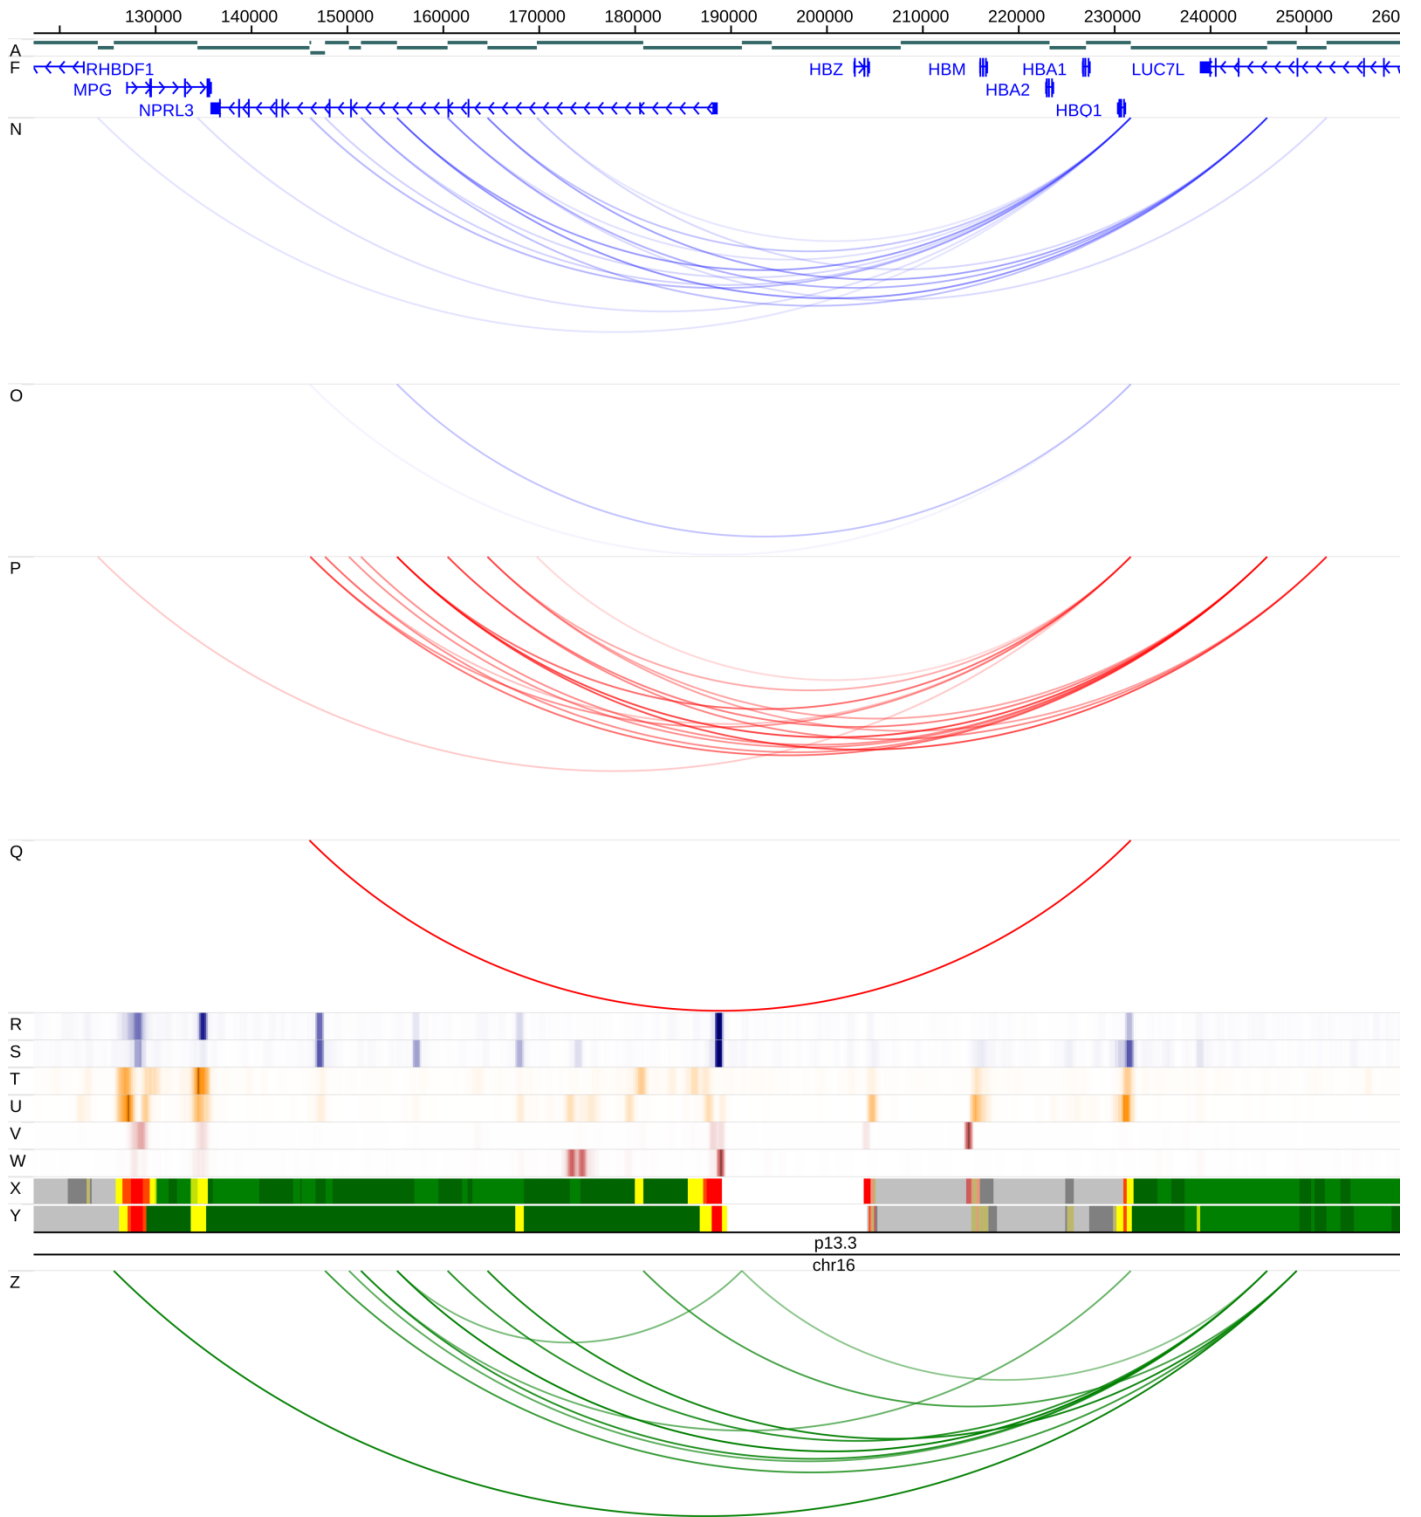

b

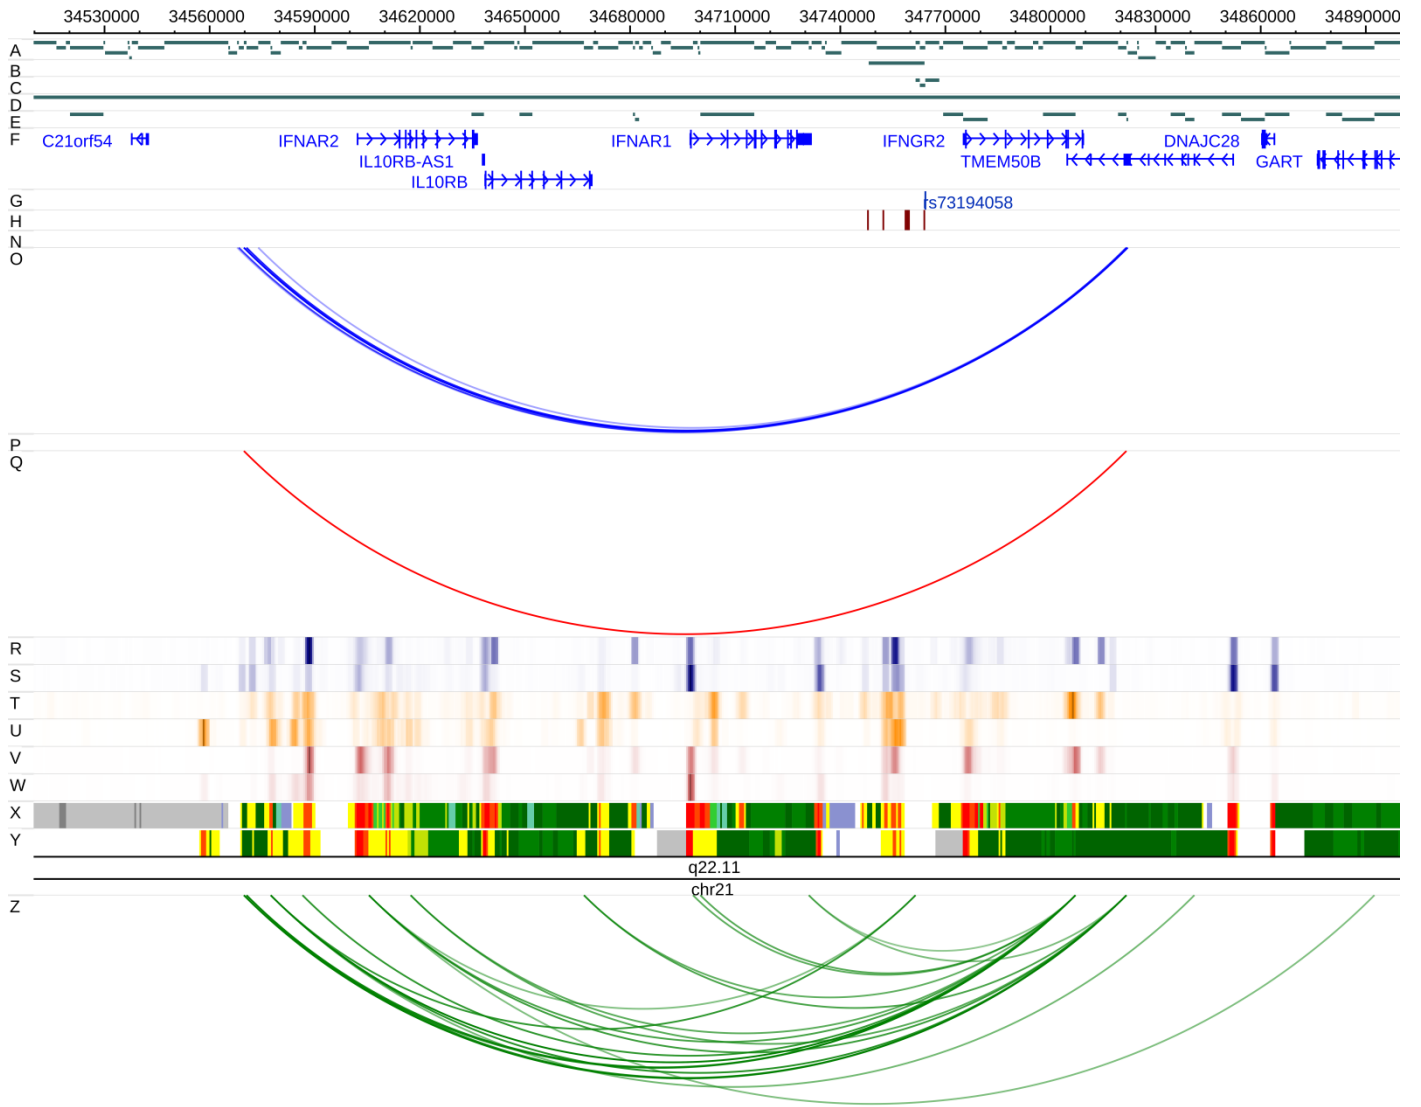

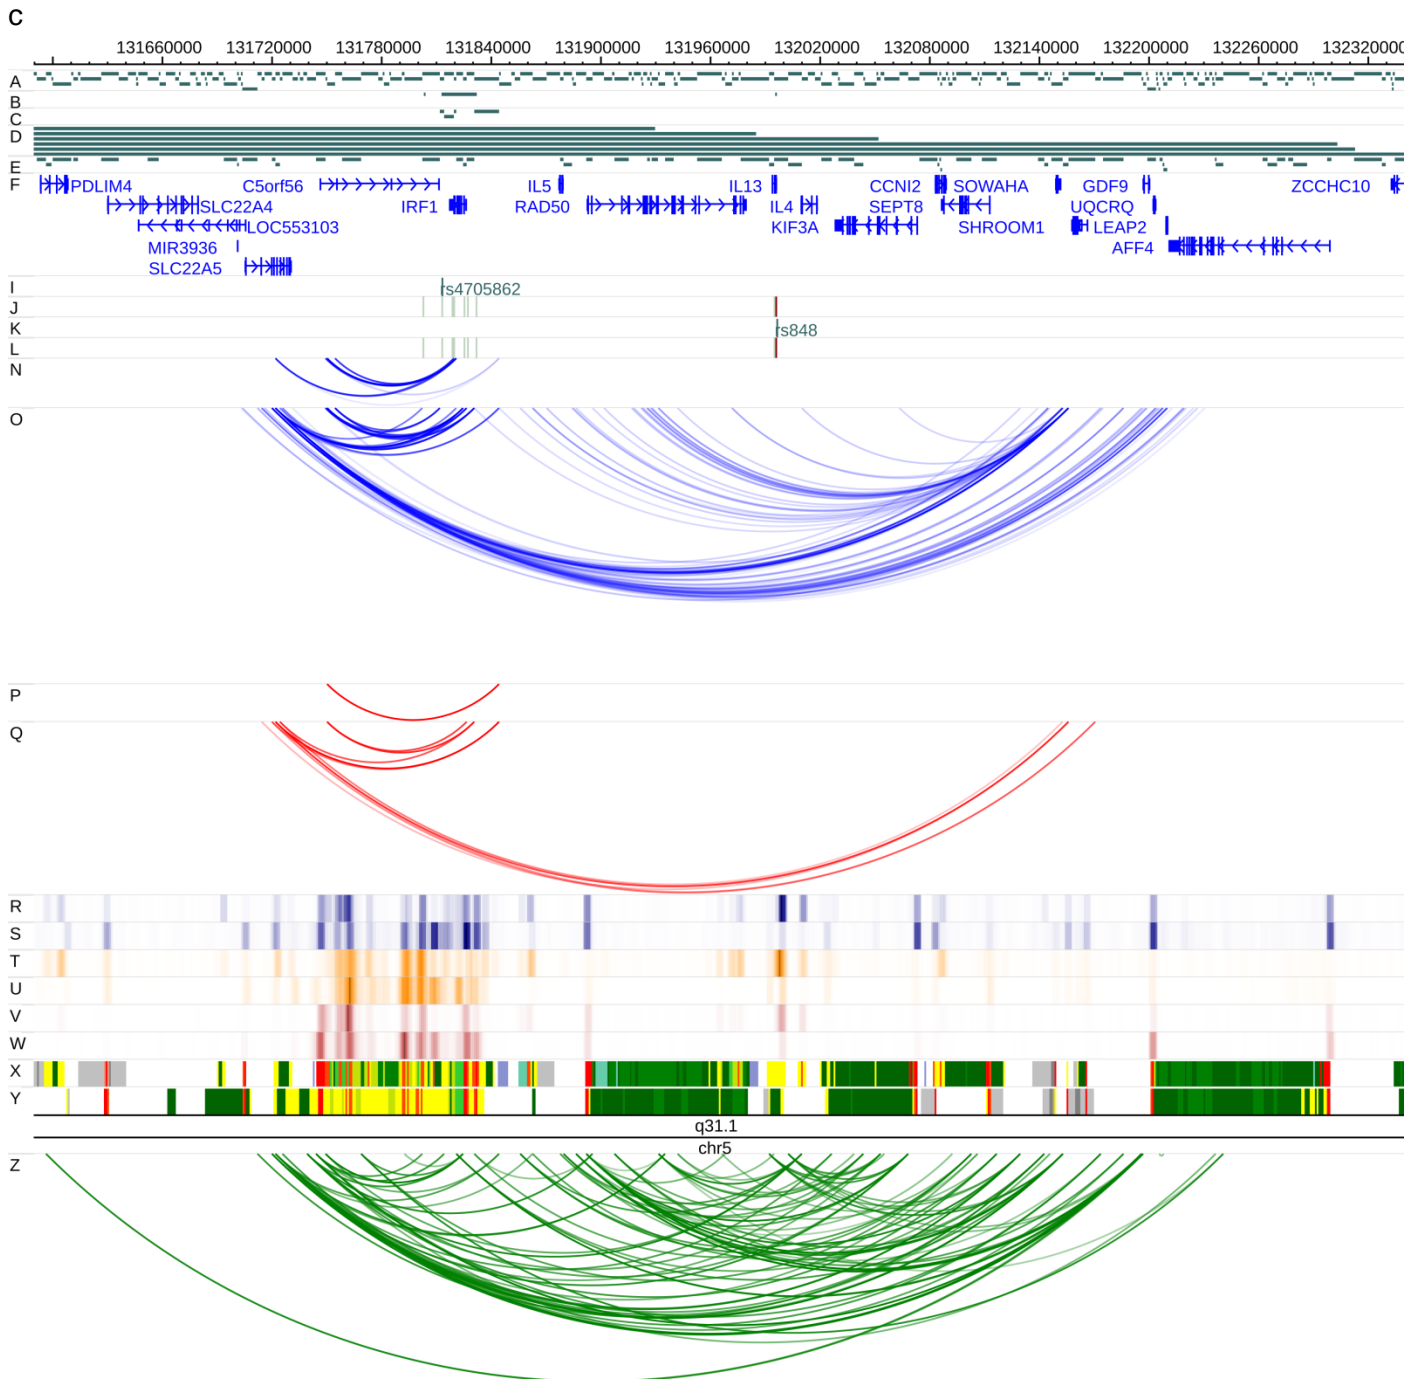

**Supplementary Figure 1 Comparison to previously published ENCODE UMass 5C data.** Both GM12878 and Jurkat cell lines replicate previously observed interactions at the *HBA* (a), *IFNAR1* (b) and *IL5* (c) loci. Genomic co-ordinates are shown along the top of each panel and tracks are labelled A-Y (empty tracks removed for clarity): A – HindIII restriction fragments; B-E – Regions targeted and restriction fragments included in the region (B, C) and promoter (D, E) capture experiments; F – RefSeq Genes from the UCSC Genome Browser, downloaded Jan 1, 2012; G,I,K – Index SNPs identified for RA (G), JIA (I) and PsA (K). Associations in red were identified in the RA ImmunoChIP study. SNPs in blue were novel associations identified in the RA trans-ethnic GWAS meta-analysis, JIA and PsA SNPs were identified in the JIA and PsA ImmunoChIP studies; H,J,L – Density plots showing 1000 Genomes SNPs in LD ( $r^2 \geq 0.8$ ) with the index SNPs (green-red) for RA (H), JIA (J) and PsA (L); M – T1D Credible set SNPs identified in the T1D ImmunoChIP study; N,O – Significant Interactions identified in the region and promoter capture experiments in GM12878 (N, O) and Jurkat (P, Q) cells; R-Y – Data from the WashU Encode track hub showing DNaseI HS sites, H3K4me1 histone marks and H3K27ac histone marks for GM12878 (R, T, V) and CD3 Primary (S, U, W) cells and BROAD ChromHMM states for GM12878 (X) and CD4 Naive Primary cells (Y); Z – Long range interaction data from ENCODE UMass 5C data for GM12878 cells.

a

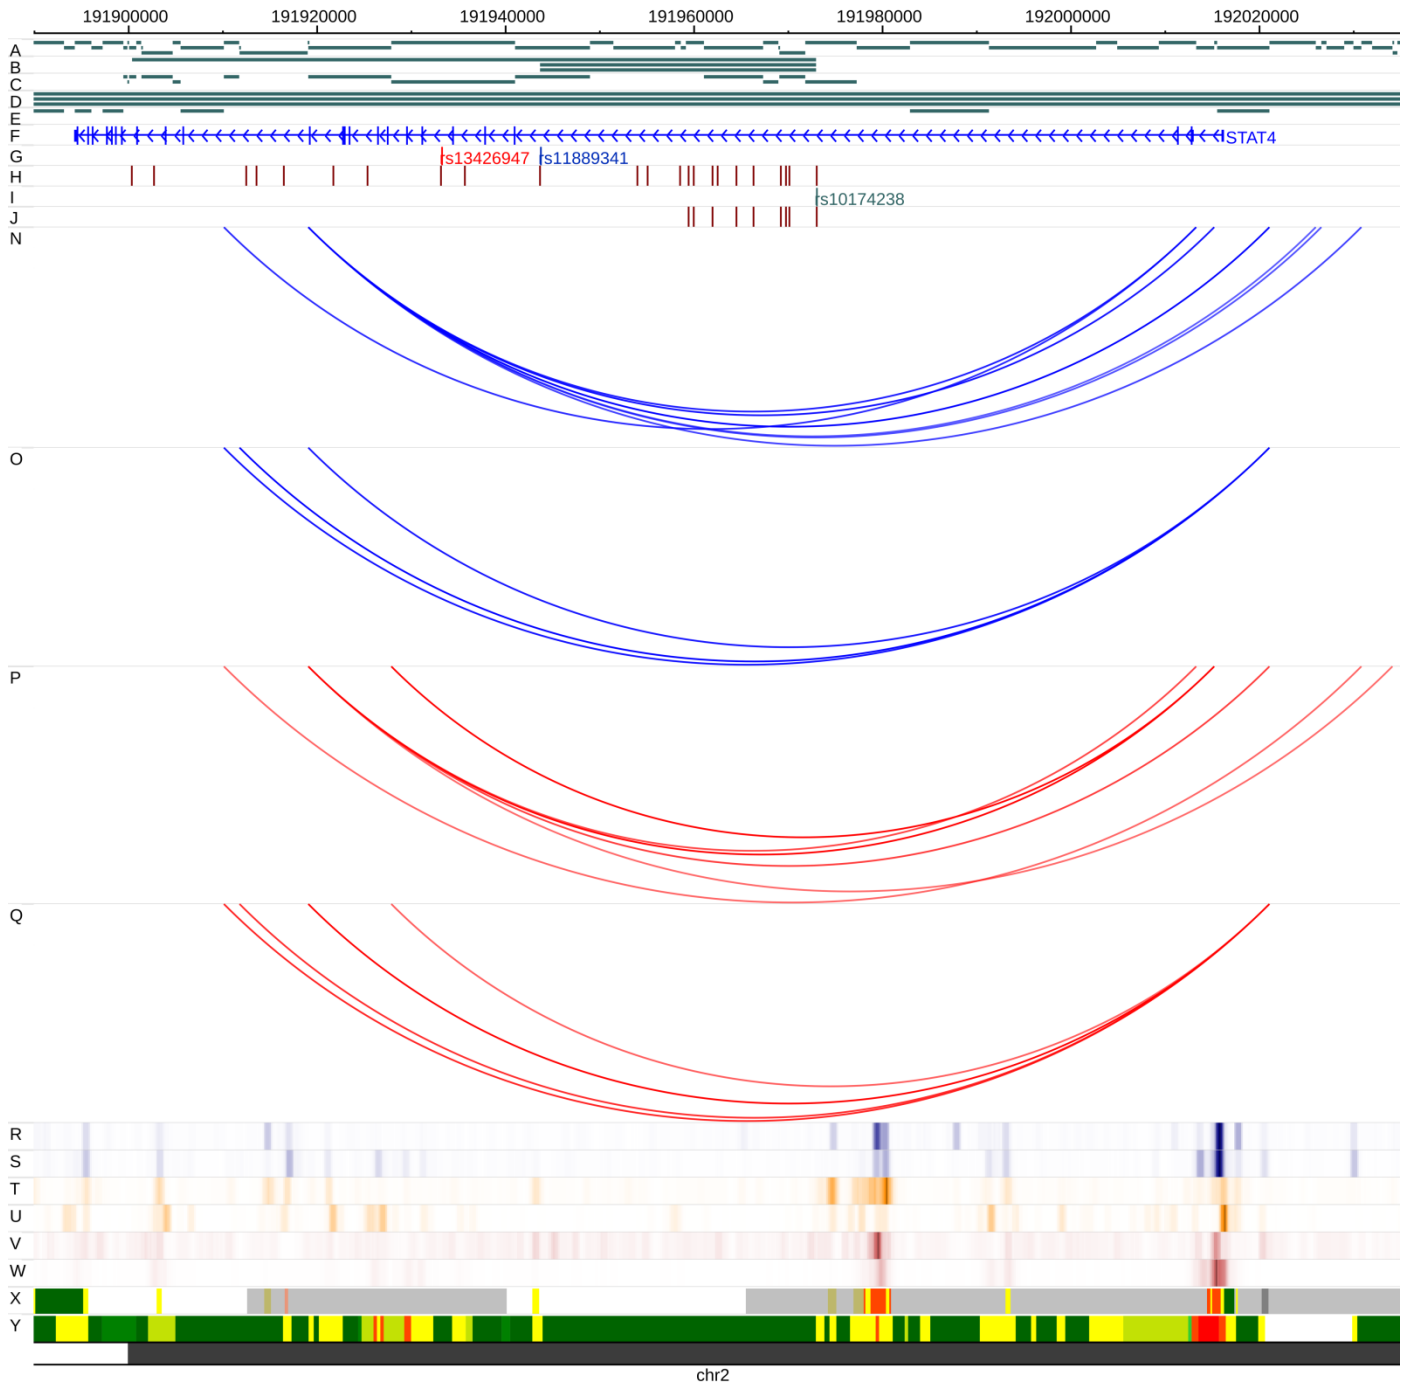

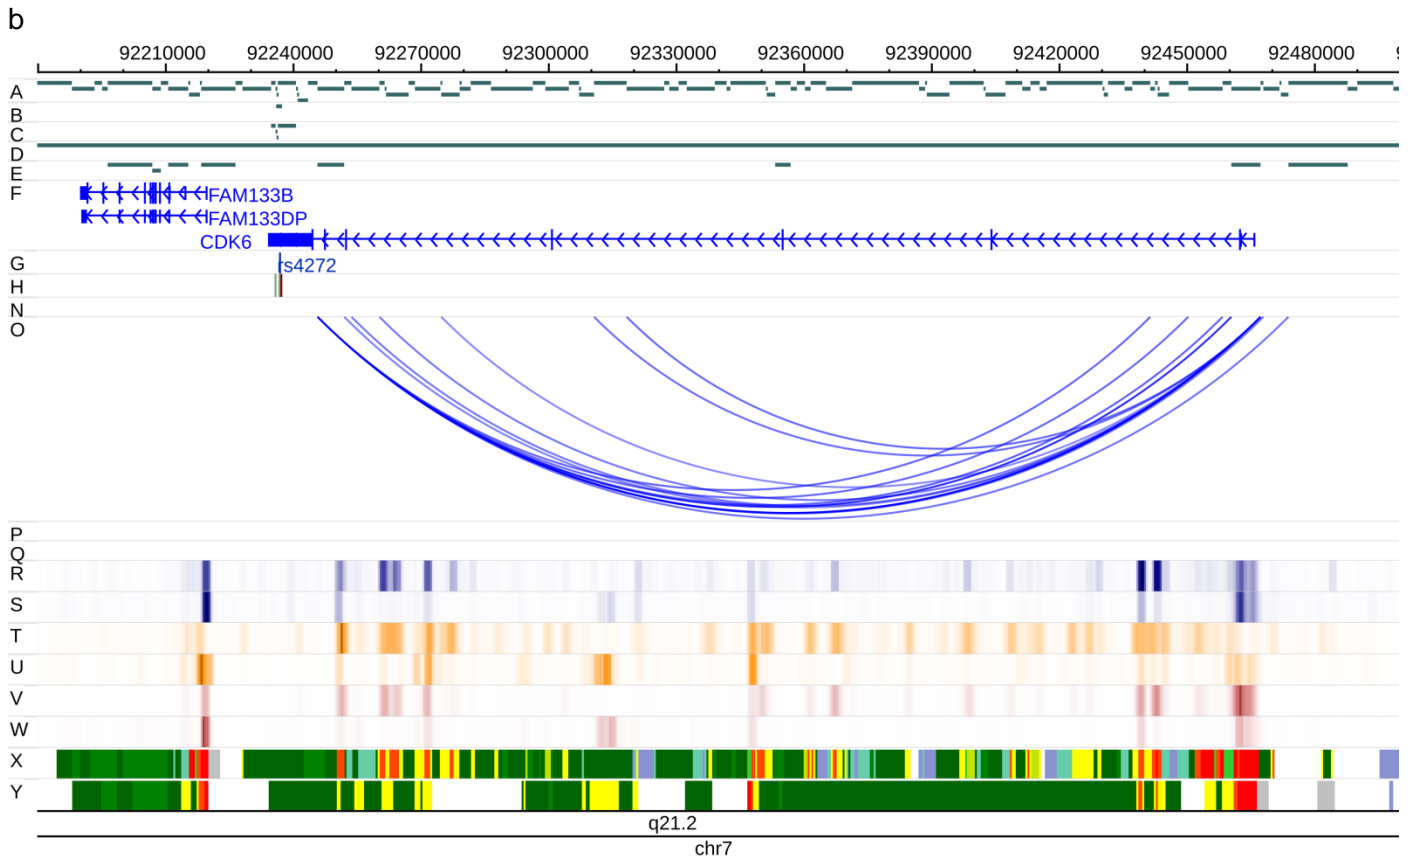

**Supplementary Figure 2 Examples of Interactions between a Gene Promoter and Associated SNPs within the Same Gene.** (a) SNPs located in the introns of *STAT4* show interactions with the *STAT4* promoter. (b) SNPs in the 3' UTR of *CDK6* show interaction with the *CDK6* promoter in GM12878 cells. Genomic co-ordinates are shown along the top of each panel and tracks are labelled A-Z as **Supplementary Figure 1**.

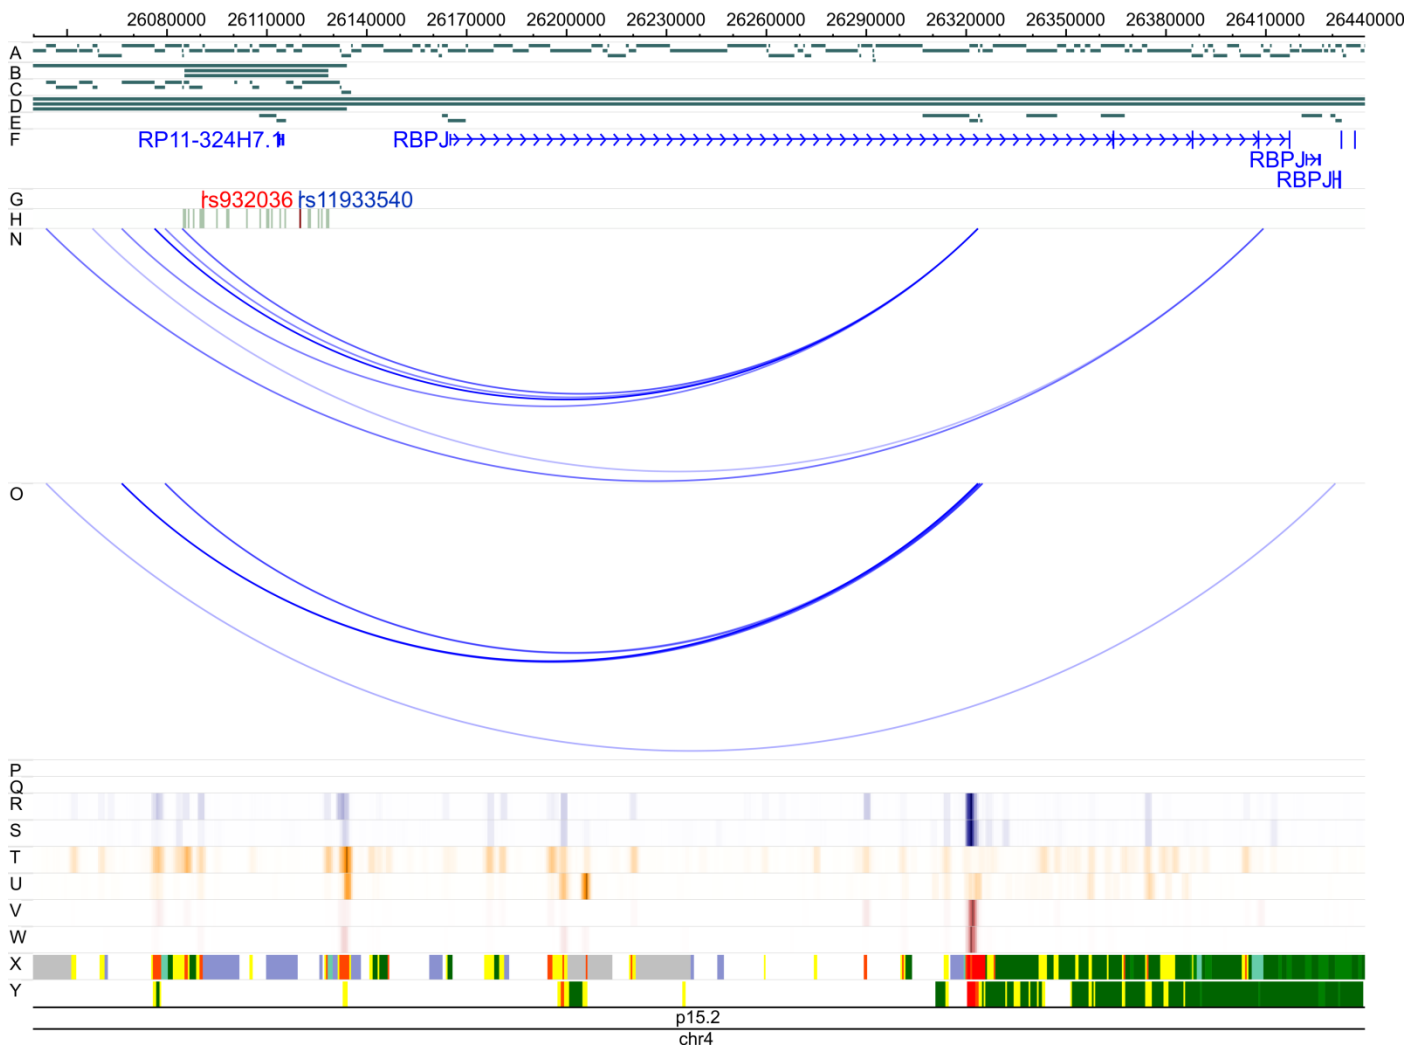

**Supplementary Figure 3 RBPJ Locus.** Associated SNPs within a lncRNA show interaction with the *RBPJ* gene promoter in GM12878 cells. Genomic co-ordinates are shown along the top of each panel and tracks are labelled A-E and G-Z as **Supplementary Figure 1**. Track F has been replaced with the GENCODE V17 genes to show the lncRNA.

a

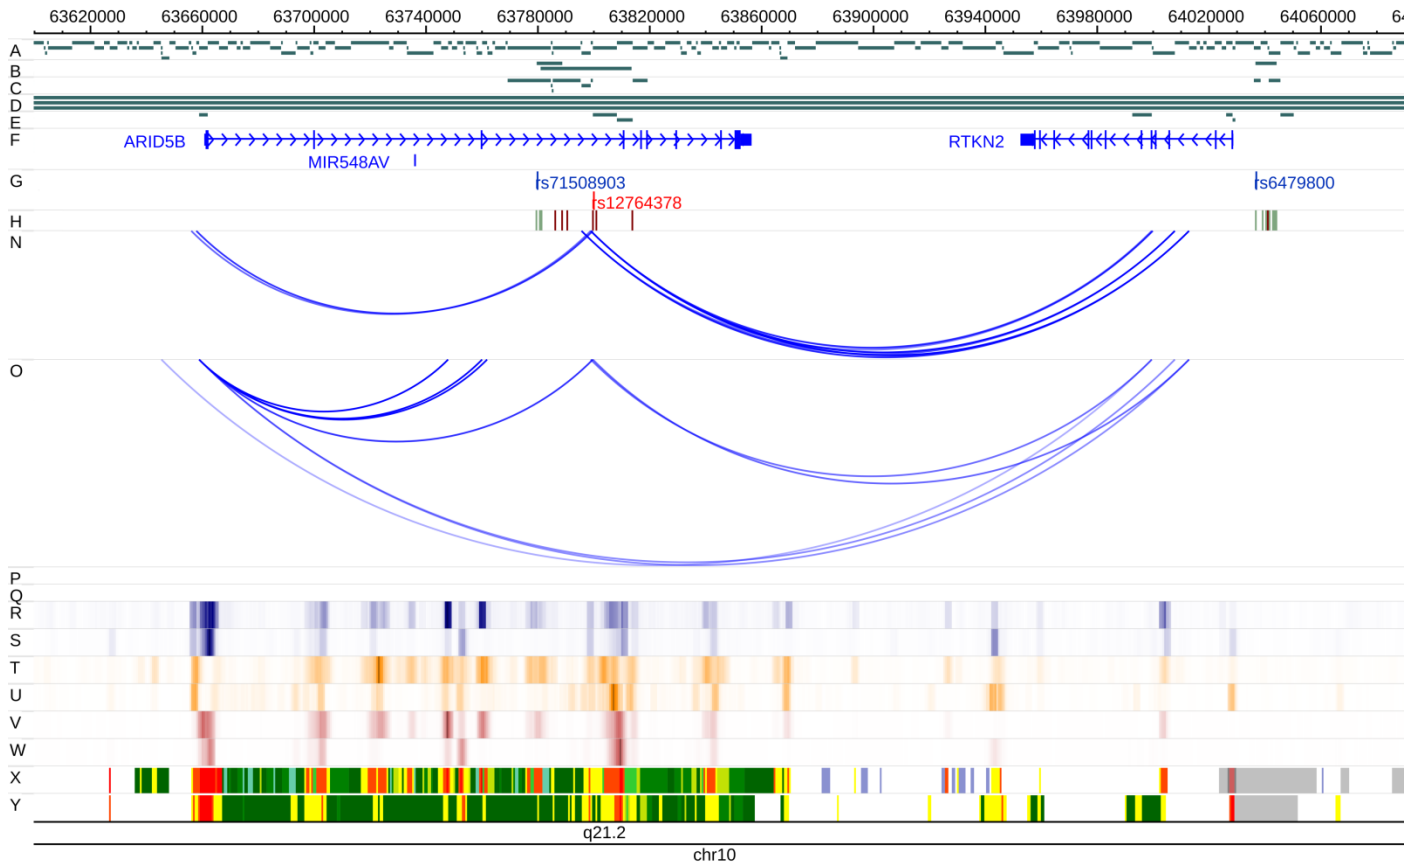

**b**

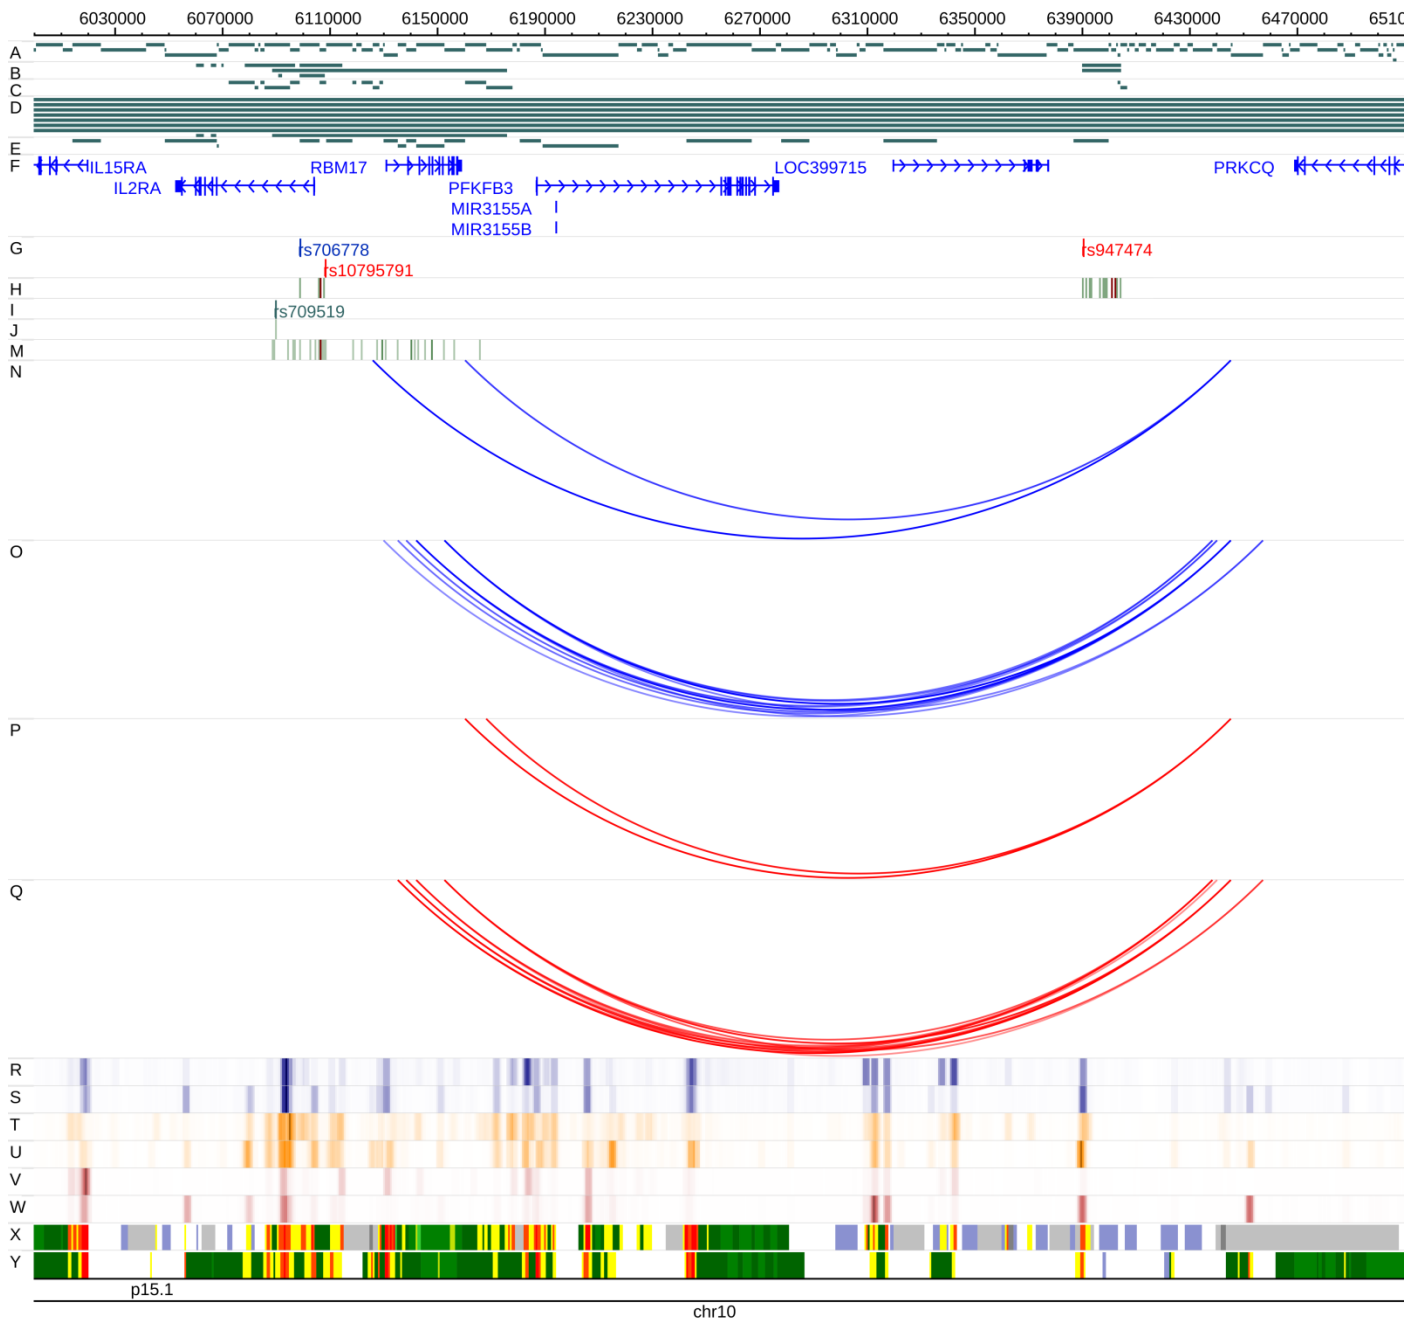



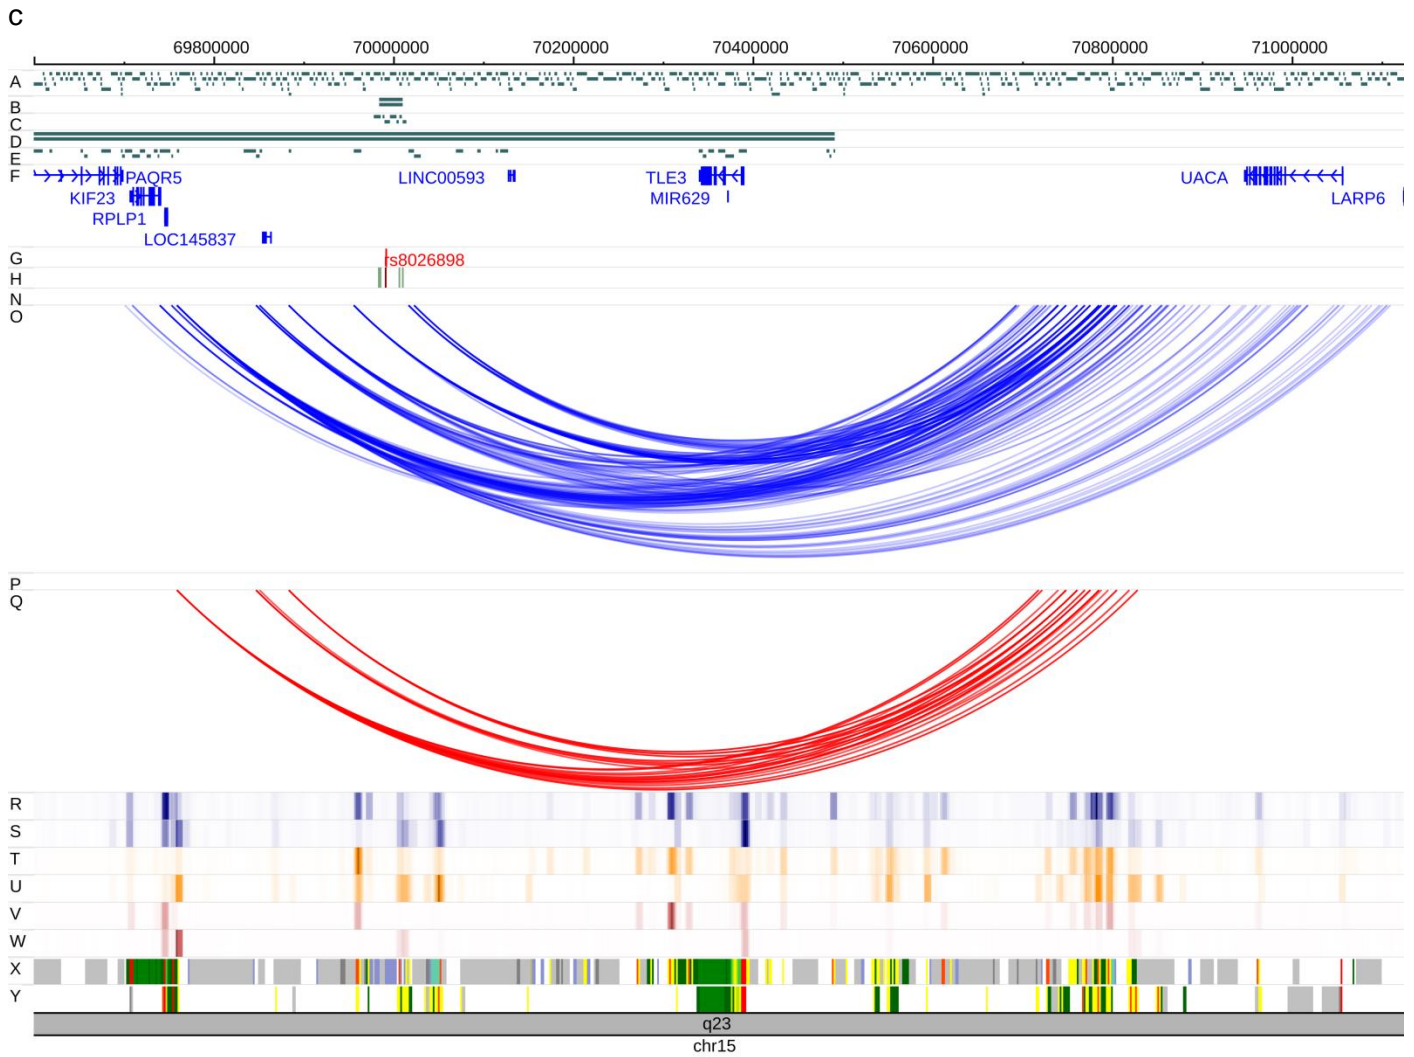

**Supplementary Figure 4 Examples of long range interactions. Restriction fragments proximal to disease associated SNPs show interaction with gene promoters some distance away. (a) *ARID5B* Locus – SNPs located within an intron of *ARID5B*, shown to interact with the promoter of *ARID5B*, also display a long range interaction with *RTKN2*. (b) *IL2RA* Locus – SNPs located upstream of *PRKCQ* display interaction to the *IL2RA* gene promoter. (c) *TLE3* Locus – SNPs upstream of *TLE3* display long range interaction with the *UACA* and *LARP6* loci. Genomic co-ordinates are shown along the top of each panel and tracks are labelled A-Z as **Supplementary Figure 1**.**

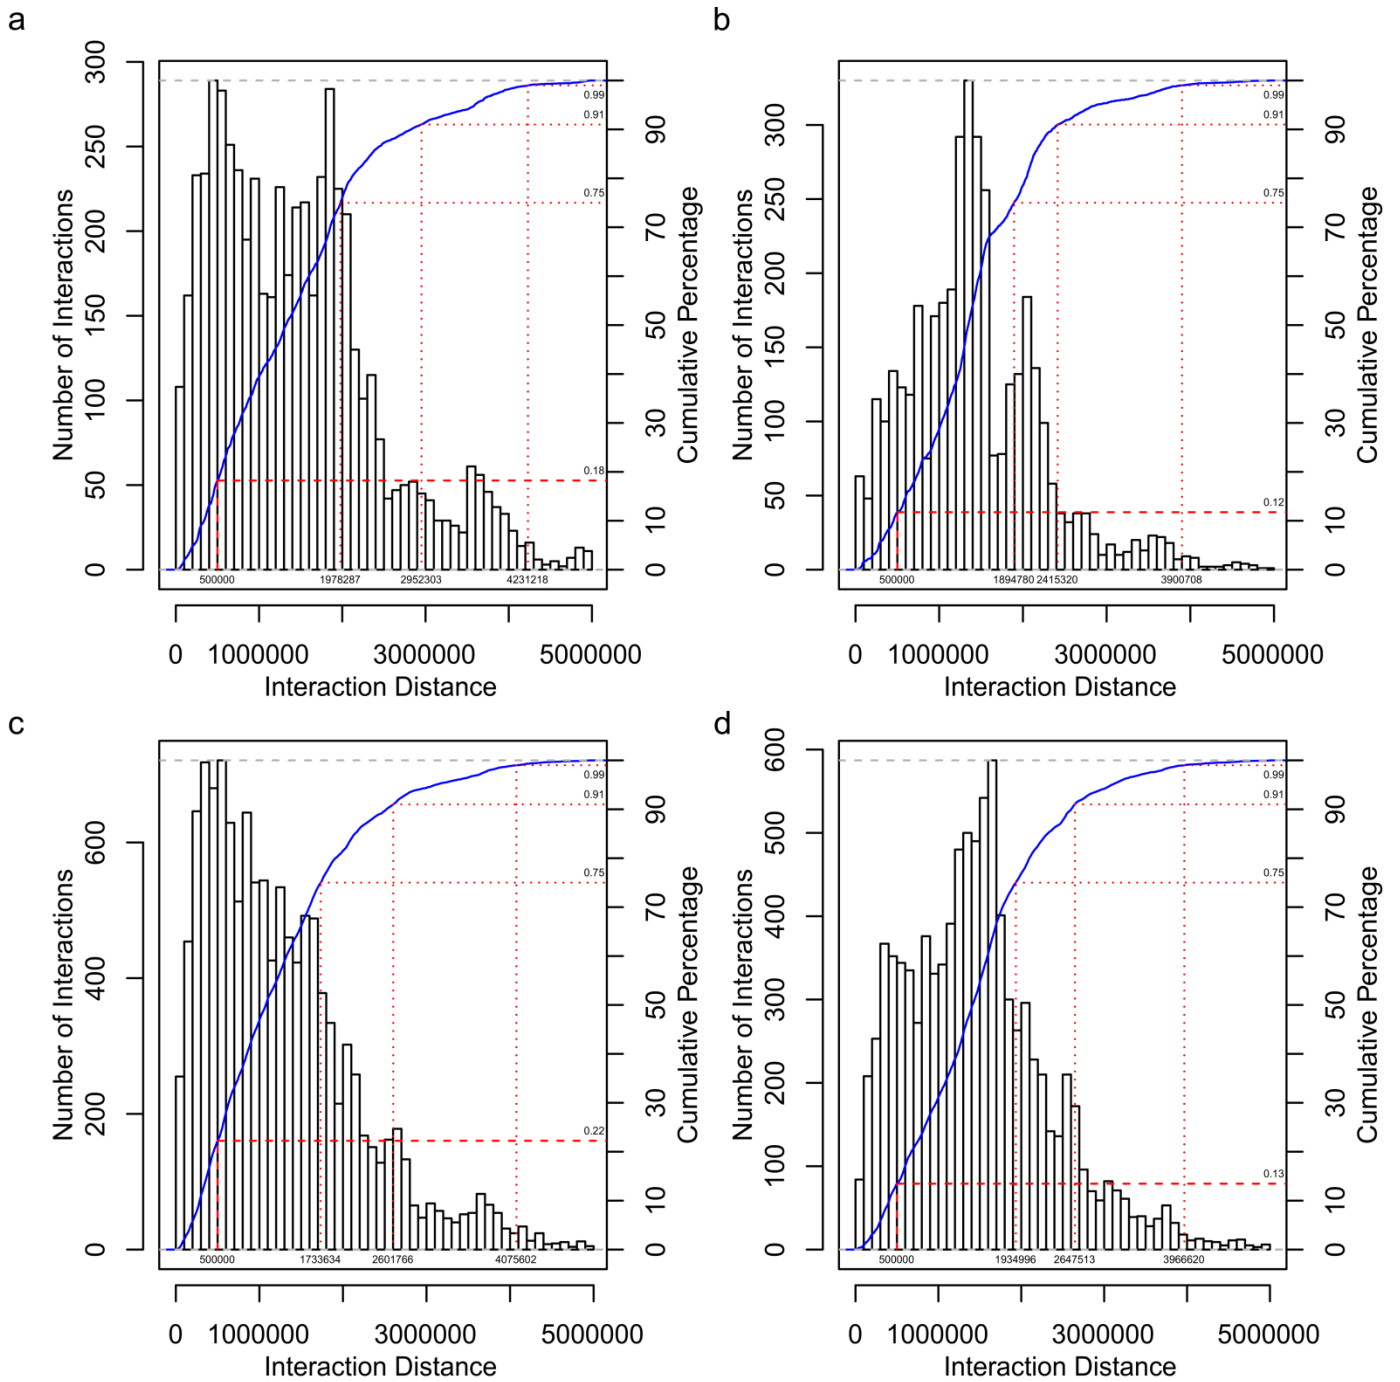

**Supplementary Figure 5 Interaction Distance Histograms.** The number of interactions are shown for 10Kb bins up to 5Mb for region and promoter capture experiments in GM12878 (**a, c**) and Jurkat (**b, d**) cells. Blue lines indicate the cumulative percentage of interactions, dotted red lines mark the 75th, 91st and 99th centiles and dashed red lines indicate the percentage of interactions  $\leq 500,000$ .

a

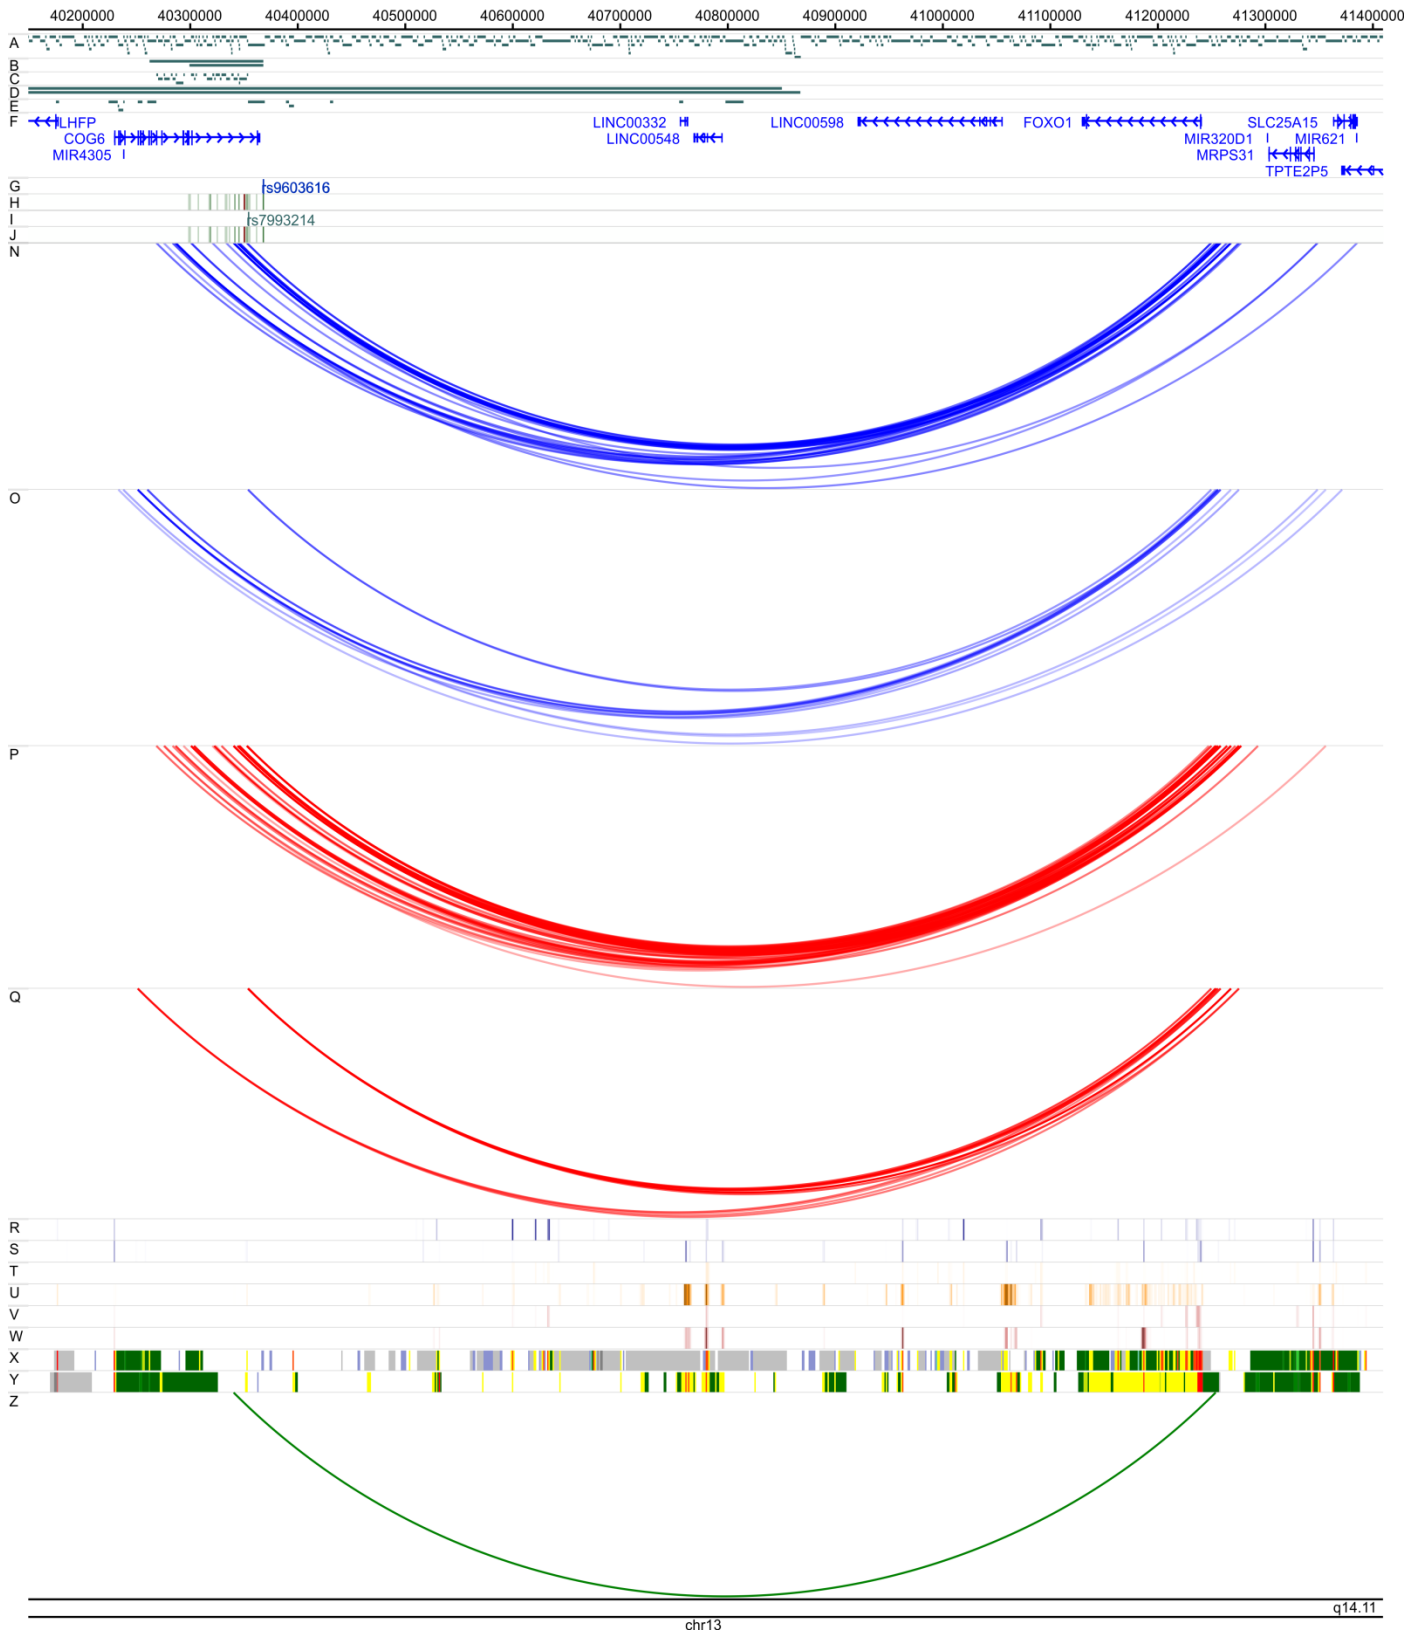

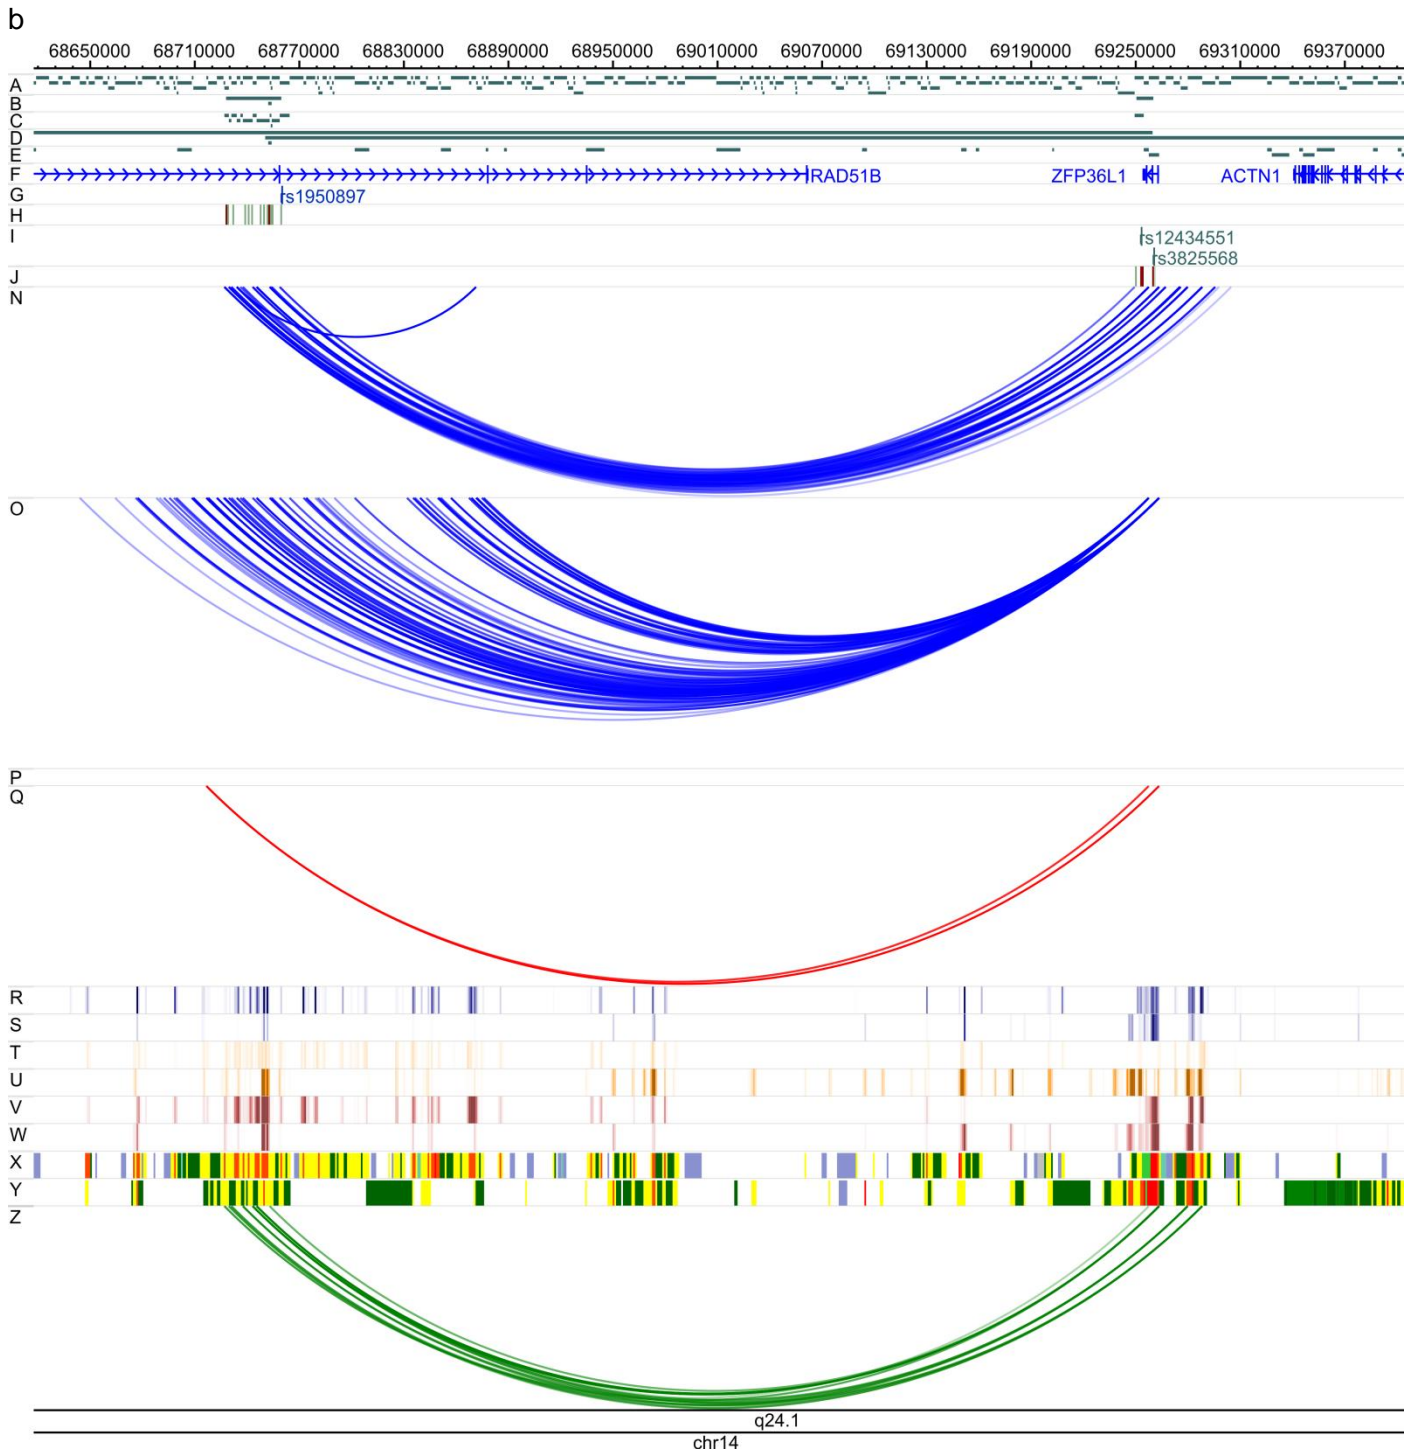

**Supplementary Figure 6 Interactions Validated in Promoter Capture and Rao *et al.* Hi-C data. (a) *COG6/FOXO1* Locus - Interactions > 500kb between SNPs located in the *COG6* gene and the *FOXO1* gene previously seen in the complement Promoter Capture are also observed in the Rao *et al.* Hi-C data at 50X observed/expected. (b) *ZFP36L1* Locus - Interactions >500kb between SNPs associated with RA and JIA with the *ZFP36L1* gene previously seen in the complement Promoter Capture are also observed in the Rao *et al.* Hi-C data at 50X observed/expected. Genomic co-ordinates are shown along the top of each panel and tracks are labelled A-Y as **Supplementary Figure 1**. Track Z shows data from Rao *et al.* in GM12878 cells at >50X observed/expected.**

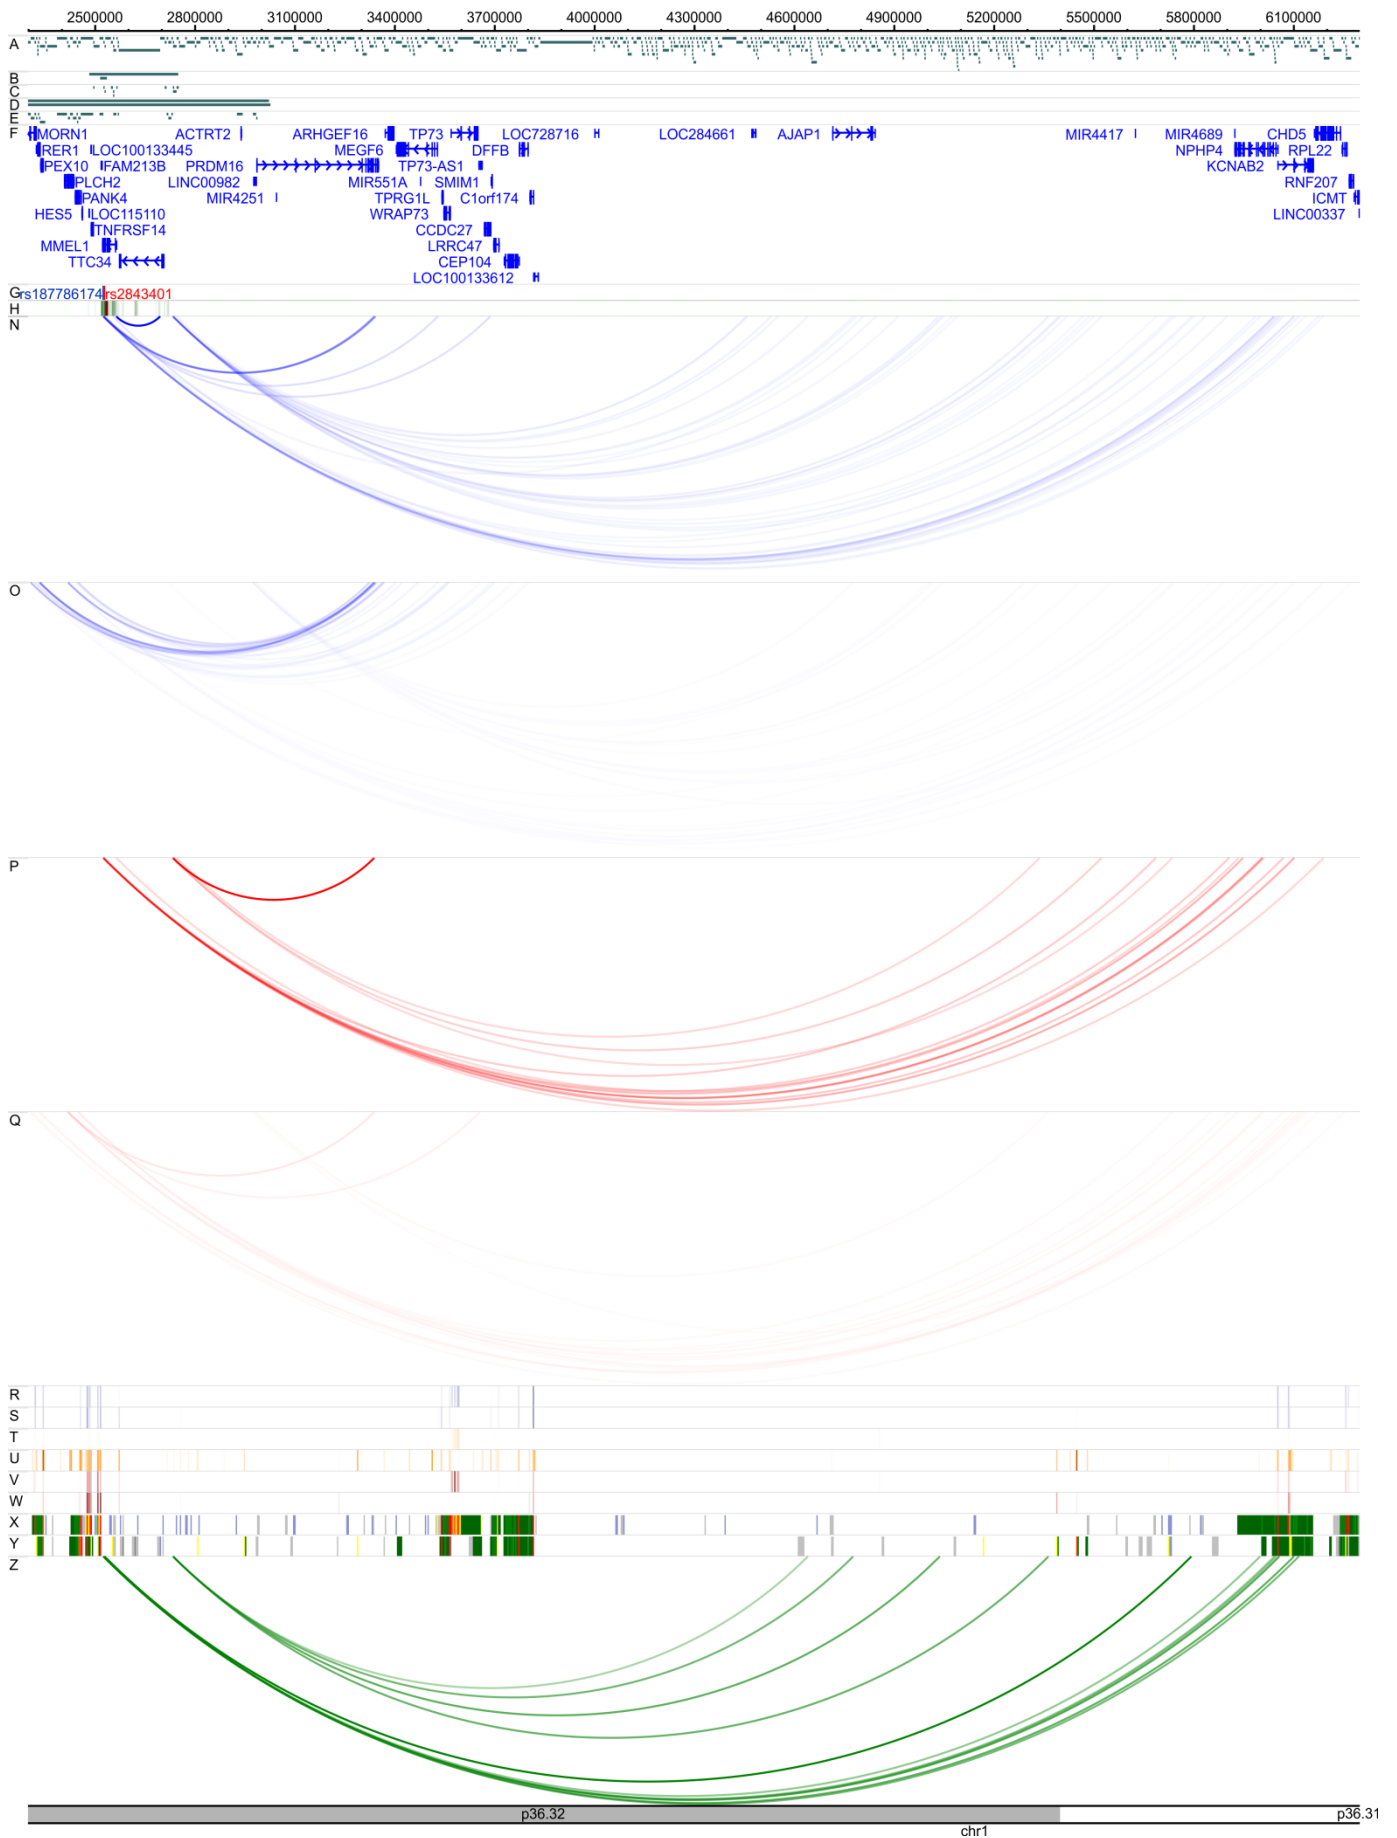

**Supplementary Figure 7 Interactions Validated in Rao *et al.* Hi-C data - *MMEL1* Locus.** SNPs located near to the *MMEL1* gene are shown to interact with multiple sites greater than 2.1Mb away in both the Region Capture and the Rao *et al.* Hi-C data in GM12878 cells. Genomic co-ordinates are shown along the top of each panel and tracks are labelled A-Y as Supplementary Figure 1. Track Z shows data from Rao *et al.* in GM12878 cells at >50X observed/expected.

## Supplementary Table 1 Validated Regions By Disease

| Region Disease | Region                                                  | Gene(s) Implicated By Capture Hi-C             | SNPs involved in interaction(s)                                                                                                                                                                                                                   | SNP Disease     |
|----------------|---------------------------------------------------------|------------------------------------------------|---------------------------------------------------------------------------------------------------------------------------------------------------------------------------------------------------------------------------------------------------|-----------------|
| T1D            | chr1:172668340-172793418                                | C1orf105,CENPL DARS2,<br>RNU6-693P,SUCO,TNFSF4 |                                                                                                                                                                                                                                                   |                 |
| T1D            | chr17:38753550-38861757                                 | EIF1                                           | rs113561632,rs11658582,rs7224919,rs7226035                                                                                                                                                                                                        | T1D             |
| RA/T1D         | chr2:204691538-204745003 rs3087243 rs3087243 rs11571302 | RAPH1                                          | rs13030124,rs13089409,rs1968351,rs34636506,rs6745050<br>rs13030124,rs144115812,rs1968351,rs34636506,rs6745050                                                                                                                                     | T1D<br>RA       |
| T1D/JIA        | chr3:46150937-46541541 rs62625034                       | CCR5<br>CXCR6                                  | rs112590754,rs62625034<br>rs11575821,rs746492,rs7652037                                                                                                                                                                                           | T1D<br>T1D      |
| RA/T1D         | chr4:26031095-26134258 rs11933540 rs932036              | RBPJ                                           |                                                                                                                                                                                                                                                   |                 |
| T1D            | chr5:35800547-35927309                                  | SPEF2                                          | rs11955657,rs11955690,rs34442743,rs3734107,rs3866449,<br>rs3866450,rs4024109,rs4024110,rs6873195,rs72742471                                                                                                                                       | T1D             |
| JIA            | 6q23*                                                   | HBS1L<br>MYB                                   |                                                                                                                                                                                                                                                   |                 |
| PsA            | rs111825814                                             | RN7SL635P                                      |                                                                                                                                                                                                                                                   |                 |
| RA/JIA         | rs13426947 rs11889341 rs10174238                        | STAT4                                          | rs11893432, rs3024859                                                                                                                                                                                                                             | RA              |
| JIA            | rs1408272 6p22*                                         | HFE,HIST1H4C                                   |                                                                                                                                                                                                                                                   |                 |
| JIA            | rs1474348 7p15*                                         | ACO02480.3                                     |                                                                                                                                                                                                                                                   |                 |
| JIA            | rs1800623 10q23*                                        | CH25H                                          |                                                                                                                                                                                                                                                   |                 |
| RA/T1D         | rs1950897 chr14:68752593-68754593                       | ZFP36L1                                        | rs10131490,rs10551501,rs17105278,rs1885013,rs1950897,<br>rs1957570,rs2104047,rs2208397,rs28498223,rs3784099,<br>rs7148416,rs7148882,rs8008961,rs8015139,rs911263<br>rs12889006,rs2236262,rs3825568                                                | RA<br>JIA<br>RA |
| RA             | rs28411352                                              | SF3A3 RNU6-510P                                | rs56023437                                                                                                                                                                                                                                        | RA              |
| RA             | rs35677470 rs73081554                                   | PXK                                            |                                                                                                                                                                                                                                                   |                 |
| RA             | rs3783782                                               | HIF1A                                          | rs146492555,rs17098394,rs2031410,rs3783782,rs3783795,<br>rs3783796,rs57887308,rs58360439,rs59149393,rs74450101,<br>rs76199319,rs76644792,rs77812793,rs79882624                                                                                    | RA              |
|                |                                                         | RP11-618G20.1                                  | rs117584363,rs146492555,rs17098394,rs17098433,rs17098496,<br>rs2031410,rs3783769,rs3783782,rs3783788,rs3783789,<br>rs3783795,rs3783796,rs57887308,rs58360439,rs59149393,<br>rs74450101,rs76199319,rs76269868,rs76644792,rs77812793,<br>rs79882624 | RA              |
| JIA/PsA        | rs4705862                                               | SLC22A5                                        | rs2548998                                                                                                                                                                                                                                         | JIA/PsA         |
| PsA            | rs4936059                                               | RP11-702B10.2                                  | rs7126028,rs7126250                                                                                                                                                                                                                               | PsA             |
| RA             | rs570676 rs331463                                       | COMMD9                                         | rs5030485,rs5030486,rs5030487                                                                                                                                                                                                                     | RA              |
| JIA            | 19p13*                                                  | LRRC25 AC008397.1<br>PDE4C                     |                                                                                                                                                                                                                                                   |                 |
| RA             | rs624988 rs798000                                       | RP11-27K13.3 ITTF2                             |                                                                                                                                                                                                                                                   |                 |
| RA/PsA         | rs657075 rs7703009 rs715285                             | RAPGEF6                                        |                                                                                                                                                                                                                                                   |                 |
| RA             | rs71508903 rs12764378                                   | RTKN2                                          |                                                                                                                                                                                                                                                   |                 |
| PsA            | rs730086                                                | CNP                                            | rs730086                                                                                                                                                                                                                                          | PsA             |
| RA/PsA         | rs73013527 rs4936059                                    | RP11-702B10.2                                  | rs10893901,rs11221402,rs1893866,rs4936059,rs7106876,<br>rs7122004<br>rs73013527                                                                                                                                                                   | PsA<br>RA       |
| RA/PsA         | rs7752903 rs610604                                      | AL357060.1,RP11-95M15.2,Y_RNA                  | rs654874                                                                                                                                                                                                                                          | PsA             |
| RA             | rs9372120                                               | RP11-10J5.1 RP11-240M16.1<br>PRDM1             | rs2299864,rs9372120,rs9386516                                                                                                                                                                                                                     | RA              |
| RA             | rs9373594                                               | PRDM1 RP1-134E15.3                             | rs2299864,rs9372120                                                                                                                                                                                                                               |                 |
| RA             | rs9826828                                               | RP11-162J8.3,UST<br>MSL2,PCCB                  |                                                                                                                                                                                                                                                   |                 |

\* personal communication

## Supplementary Table 2 Region Statistics

| Experiment                                                                |                                                                           | Cell      |           |
|---------------------------------------------------------------------------|---------------------------------------------------------------------------|-----------|-----------|
|                                                                           |                                                                           | GM12878   | Jurkat    |
| Region Capture                                                            | Average Region Size (bp)                                                  | 64,787    |           |
|                                                                           | Average Number of Interactions per Region                                 | 48.7      | 38.2      |
|                                                                           | Average Number Interactions per Restriction Fragment                      | 8.9       | 8.3       |
|                                                                           | Average Interaction Distance (bp)                                         | 1,451,825 | 1,430,506 |
|                                                                           | Number of Regions Interacting with a Promoter                             | 37        | 25        |
|                                                                           | Number of Fragments Interacting with a Promoter                           | 136       | 63        |
|                                                                           | Number of Associated SNPs in the Interacting Regions ( $r^2 \geq 0.8$ )   | 5,329     |           |
|                                                                           | Number of Associated SNPs in the Interacting Fragments ( $r^2 \geq 0.8$ ) | 671       | 449       |
|                                                                           | Number of Associated SNPs in the Interacting Regions ( $r^2 \geq 0.9$ )   | 3,033     |           |
| Number of Associated SNPs in the Interacting Fragments ( $r^2 \geq 0.9$ ) | 504                                                                       | 292       |           |
| Promoter Capture                                                          | Average Number of Genes in 1Mb Regions                                    | 359       |           |
|                                                                           | Average Distance of Promoters to Region                                   | 212,762   |           |
|                                                                           | Number of Genes that show Interactions                                    | 1,341     | 1,136     |
|                                                                           | Average Interaction Distance (bp)                                         | 1,262,173 | 1,472,446 |

### Supplementary Table 3 Sequencing & QC Statistics

| Cell    | Capture Experiment | Replicate | Raw Reads   | QC Filtered Reads | Aligned Pairs | Valid Di-tags | Unique Di-tags | Cis        | Trans      | Cis/Trans | On Target (%)          | On Target Cis | On Target Trans | On Target Cis/Trans | Bait to Bait (%)      |
|---------|--------------------|-----------|-------------|-------------------|---------------|---------------|----------------|------------|------------|-----------|------------------------|---------------|-----------------|---------------------|-----------------------|
| GM12878 | Region             | Rep 1     | 80,014,978  | 78,467,719        | 59,929,732    | 51,465,358    | 45,892,434     | 38,853,120 | 7,039,314  | 5.52      | 20,113,771<br>(43.83%) | 17,013,285    | 3,100,486       | 5.49                | 3,359,680<br>(16.7%)  |
| GM12878 | Region             | Rep 2     | 112,175,016 | 108,735,810       | 88,841,743    | 77,796,593    | 46,255,464     | 37,792,853 | 8,462,611  | 4.47      | 40,793,883<br>(88.19%) | 33,366,346    | 7,427,537       | 4.49                | 6,199,018<br>(15.2%)  |
| Jurkat  | Region             | Rep 1     | 78,543,748  | 76,963,038        | 60,126,486    | 52,225,839    | 44,810,487     | 37,562,253 | 7,248,234  | 5.18      | 28,073,973<br>(62.65%) | 23,541,206    | 4,532,767       | 5.19                | 5,877,743<br>(20.94%) |
| Jurkat  | Region             | Rep 2     | 105,436,603 | 101,765,348       | 77,022,176    | 69,953,227    | 50,891,861     | 41,540,063 | 9,351,798  | 4.44      | 26,829,286<br>(52.72%) | 21,840,131    | 4,989,155       | 4.38                | 3,173,044<br>(11.83%) |
| GM12878 | Promoter           | Rep 1     | 151,946,987 | 148,618,189       | 110,497,620   | 94,604,772    | 81,500,754     | 68,047,789 | 13,452,965 | 5.06      | 46,738,753<br>(57.35%) | 38,688,459    | 8,050,294       | 4.81                | 4,917,795<br>(10.52%) |
| GM12878 | Promoter           | Rep 2     | 186,043,905 | 181,179,872       | 137,965,848   | 119,415,709   | 85,847,090     | 68,580,262 | 17,266,828 | 3.97      | 74,373,047<br>(86.63%) | 59,359,899    | 15,013,148      | 3.95                | 7,411,636<br>(9.97%)  |
| Jurkat  | Promoter           | Rep 1     | 159,267,590 | 155,743,979       | 116,474,859   | 100,827,324   | 85,111,648     | 70,572,012 | 14,539,636 | 4.85      | 59,494,411<br>(69.9%)  | 49,187,395    | 10,307,016      | 4.77                | 4,173,962<br>(7.02%)  |
| Jurkat  | Promoter           | Rep 2     | 177,413,627 | 172,658,827       | 126,626,485   | 114,899,145   | 86,965,933     | 70,383,387 | 16,582,546 | 4.24      | 55,491,937<br>(63.81%) | 44,699,709    | 10,792,228      | 4.14                | 5,073,930<br>(9.14%)  |
